# Supplementary material for: Daily Sampling of an HIV-1 Patient with Slowly Progressing Disease Displays Persistence of Multiple env Subpopulations Consistent with Neutrality
Source: PubMed Central journal article supplement (PMC3149046; doi:10.1371/journal.pone.0021747), 2011-08-02

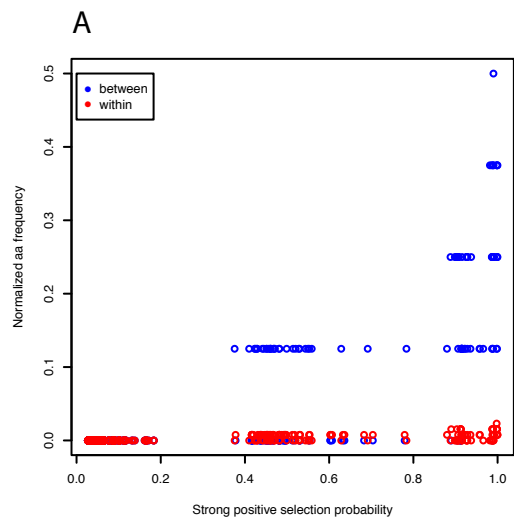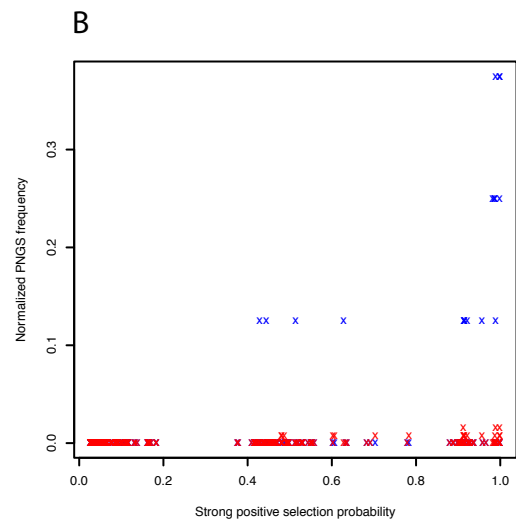

Supplement: pone.0021747.s003.pdf [file pone.0021747.s003.pdf]
